# Supplementary material for: Mechanisms of allergen-specific B cell tolerance in children with cow’s milk-oral immunotherapy and natural outgrowth of milk allergy
Source: Research Square preprint supplement (doi:10.21203/rs.3.rs-1134709/v1), 2021-12-16
Supplement: Supplementary file 1 [file 548eb2c6fda02224c4fd222c.docx]

| **Table 1: Participants’ characteristics** | | | |  | |  | |  | |  | |  | |  | |  | |  | |  | |  | |
| --- | --- | --- | --- | --- | --- | --- | --- | --- | --- | --- | --- | --- | --- | --- | --- | --- | --- | --- | --- | --- | --- | --- | --- |
| **Allergic group (OIT)** | | |  |  |  | |  | |  | |  | |  | |  | |  | |  | |  | |
| **List** | **PPID** | **Visit Date** | **Gender** | **Age** | **Months after OIT** | | **Type** | | **Date of Screening DBPCFC:** | | **Which DBC were performed?** | | **Cumulative Tolerated milk dose (mg):** | | **Cumulative ingested milk dose (mg):** | | **Outcomes: Tolerant or Desensitized?** | | **Date of IgE test:** | | **Milk IgE** | |
| 1 | 07-T19 | 24/08/2015 | Female | 10 | 0 | | PBMC | | 04/09/2015 | | Milk | | 0 | | 5 | | Tolerance | | 07/08/2015 | | 7.93 | |
|  | 07-T19 | 09/08/2016 | Female | 11 | 6 | | PBMC | | 02/09/2015 | | Milk | | 5 | | 25 | |  | | 31/08/2015 | | 2.32 | |
|  | 07-T19 | 16/08/2017 | Female | 12 | 18 | | PBMC | |  | |  | |  | |  | |  | |  | |  | |
|  |  |  |  |  |  | |  | |  | |  | |  | |  | |  | |  | |  | |
| 2 | 71-0132 | 03/01/2012 | Male | 19 | 0 | | PBMC | | 03/01/2012 | | Milk | | 7.7 | | 32.7 | | Tolerance | | 18/06/2007 | | 12.3 | |
|  | 71-0132 | 06/09/2012 | Male | 19 | 7 | | PBMC | |  | |  | |  | |  | |  | |  | |  | |
|  | 71-0132 | 28/03/2014 | Male | 21 | 26 | | PBMC | |  | |  | |  | |  | |  | |  | |  | |
|  |  |  |  |  |  | |  | |  | |  | |  | |  | |  | |  | |  | |
| 3 | 72-0101 | 28/06/2011 | Female | 15 | 0 | | PBMC | | 02/09/2011 | | milk | | 32.7 | | 82.7 | | Desensitized | | 28/06/2011 | | 822 | |
|  | 72-0101 | 22/08/2012 | Female | 16 | 6 | | PBMC | |  | |  | |  | |  | |  | |  | |  | |
|  | 72-0101 | 26/02/2014 | Female | 17 | 24 | | PBMC | |  | |  | |  | |  | |  | |  | |  | |
|  |  |  |  |  |  | |  | |  | |  | |  | |  | |  | |  | |  | |
| 4 | 72-0161 | 24/07/2012 | Female | 11 | 0 | | PBMC | | 24/07/2012 | | Milk | | 0.1 | | 1.7 | | Desensitized | | 17/06/2012 | | 95.7 | |
|  | 72-0161 | 23/07/2013 | Female | 12 | 8 | | PBMC | |  | |  | |  | |  | |  | |  | |  | |
|  | 72-0161 | 06/08/2015 | Female | 14 | 33 | | PBMC | |  | |  | |  | |  | |  | |  | |  | |
|  |  |  |  |  |  | |  | |  | |  | |  | |  | |  | |  | |  | |
| 5 | 72-0175 | 12/08/2013 | Male | 15 | 0 | | PBMC | | 19/08/2013 | | Milk | | 32.7 | | 82.7 | | Desensitized | | 19/02/2013 | | 56.8 | |
|  | 72-0175 | 14/07/2014 | Male | 16 | 6 | | PBMC | |  | |  | |  | |  | |  | |  | |  | |
|  | 72-0175 | 04/03/2016 | Male | 18 | 25 | | PBMC | |  | |  | |  | |  | |  | |  | |  | |
|  |  |  |  |  |  | |  | |  | |  | |  | |  | |  | |  | |  | |
| 6 | M10-4 | 10/11/2014 | Female | 8 | 0 | | PBMC | | 03/12/2014 | | Milk | | 32.7 | | 175 | | Tolerance | | 14/01/2015 | | 3.59 | |
|  | M10-4 | 02/12/2015 | Female | 9 | 6 | | PBMC | | 07/12/2015 | | Milk | | 4000 | | 6000 | |  | | 03/12/2015 | | 4.56 | |
|  | M10-4 | 15/06/2017 | Female | 11 | 24 | | PBMC | |  | |  | |  | |  | |  | |  | |  | |
|  |  |  |  |  |  | |  | |  | |  | |  | |  | |  | |  | |  | |
| 7 | M23-4 | 09/03/2015 | Male | 8 | 0 | | PBMC | | 02/03/2015 | | Milk | | 0.1 | | 5 | | Tolerance | | 26/12/2014 | | 12.4 | |
|  | M23-4 | 14/01/2016 | Male | 9 | 7 | | PBMC | | 21/01/2016 | | Milk | | 8000 | | 12000 | |  | | 14/01/2016 | | 8.12 | |
|  | M23-4 | 05/07/2017 | Male | 11 | 25 | | PBMC | |  | |  | |  | |  | |  | |  | |  | |
|  |  |  |  |  |  | |  | |  | |  | |  | |  | |  | |  | |  | |
| 8 | M24-3 | 02/03/2015 | Male | 11 | 0 | | PBMC | | 25/02/2015 | | Milk | | 0.1 | | 5 | | Tolerance | | 12/02/2015 | | 2.64 | |
|  | M24-3 | 17/12/2015 | Male | 12 | 6 | | PBMC | | 17/12/2015 | | Milk | | 8000 | | 12000 | |  | | 17/12/2015 | | 1.83 | |
|  | M24-3 | 01/02/2017 | Male | 13 | 19 | | PBMC | |  | |  | |  | |  | |  | |  | |  | |
|  |  |  |  |  |  | |  | |  | |  | |  | |  | |  | |  | |  | |
| 9 | M47-5 | 11/06/2015 | Female | 7 | 0 | | PBMC | | 18/06/2015 | | Milk | | 32.7 | | 75 | | Tolerance | | 04/06/2015 | | 24.1 | |
|  | M47-5 | 31/03/2016 | Female | 7 | 6 | | PBMC | | 11/04/2016 | | Milk | | 8000 | | 12000 | |  | | 31/03/2016 | | 34.3 | |
|  | M47-5 | 15/06/2017 | Female | 9 | 20 | | PBMC | |  | |  | |  | |  | |  | |  | |  | |
| 10 | 71-0015 | 18/03/2013 | Male | 9 | 31 | | PBMC | | 06/01/2011 | | Milk | | 183.1 | | 583.1 | | Desensitized | | 25/02/2010 | | 25.9 | |
|  |  |  |  |  |  | |  | |  | |  | |  | |  | |  | |  | |  | |
| 11 | 71-0031 | 05/12/2013 | Male | 27 | 32 | | PBMC | | 15/09/2010 | | milk | | 1.7 | | 7.7 | | Desensitized | | 24/09/2009 | | 15.4 | |
|  |  |  |  |  |  | |  | |  | |  | |  | |  | |  | |  | |  | |
| 12 | 71-0070 | 02/12/2014 | Female | 11 | 34 | | PBMC | | 19/09/2011 | | Milk | | 1.7 | | 7.7 | | Desensitized | | 13/06/2011 | | 3.6 | |
|  |  |  |  |  |  | |  | |  | |  | |  | |  | |  | |  | |  | |
| 13 | 71-0142 | 27/02/2015 | Male | 13 | 35 | | PBMC | | 04/11/2011 | | Milk | | 32.7 | | 82.7 | | Tolerance | | 17/11/2014 | | 0.34 | |
|  |  |  |  |  |  | |  | |  | |  | |  | |  | |  | | 05/05/2009 | | 0 | |
| **Natural tolerance (NT) group** | | |  |  |  | |  | |  | |  | |  | |  | |  | |  | |  | |
| **List** | **PPID** | **Visit Date** | **Gender** | **Age** | **Months after OIT** | | **Type** | | **Date of IgE test:** | | **Milk IgE** | |  | |  | |  | |  | |  | |
| 1 | 04-T02 | 29/07/2015 | Male | 8 | 0 | | PBMC | | 01/04/2015 | | 16 | |  | |  | |  | |  | |  | |
|  |  |  |  |  |  | |  | | 02/05/2016 | | 2 | |  | |  | |  | |  | |  | |
| 2 | 04-T04 | 09/11/2015 | Female | 11 | 0 | | PBMC | | 27/03/2015 | | 23 | |  | |  | |  | |  | |  | |
|  |  |  |  |  |  | |  | | 03/05/2016 | | 5 | |  | |  | |  | |  | |  | |
| 3 | 07-T01 | 17/04/2015 | Female | 6 | 0 | | PBMC | | 15/03/2015 | | 37 | |  | |  | |  | |  | |  | |
|  |  |  |  |  |  | |  | | 16/03/2016 | | 0.35 | |  | |  | |  | |  | |  | |
| 4 | M01-2 | 17/11/2014 | Male | 7 | 0 | | PBMC | | 18/02/2014 | | 21 | |  | |  | |  | |  | |  | |
|  |  |  |  |  |  | |  | | 20/03/2015 | | 2 | |  | |  | |  | |  | |  | |
| 5 | M03-3 | 16/03/2015 | Male | 12 | 0 | | PBMC | | 20/01/2014 | | 112 | |  | |  | |  | |  | |  | |
|  |  |  |  |  |  | |  | | 03/02/2015 | | 4 | |  | |  | |  | |  | |  | |
| 6 | M08-2 | 03/12/2014 | Female | 5 | 0 | | PBMC | | 10/04/2014 | | 93 | |  | |  | |  | |  | |  | |
|  |  |  |  |  |  | |  | | 02/05/2015 | | 2 | |  | |  | |  | |  | |  | |
| 7 | M09-5 | 30/01/2015 | Male | 8 | 0 | | PBMC | | 25/03/2014 | | 33 | |  | |  | |  | |  | |  | |
|  |  |  |  |  |  | |  | | 01/04/2015 | | 0.35 | |  | |  | |  | |  | |  | |
| 8 | M16-4 | 06/11/2014 | Male | 7 | 0 | | PBMC | | 21/04/2014 | | 65 | |  | |  | |  | |  | |  | |
|  |  |  |  |  |  | |  | | 02/05/2015 | | 3 | |  | |  | |  | |  | |  | |
| 9 | M27-2 | 09/12/2014 | Female | 9 | 0 | | PBMC | | 10/03/2014 | | 77 | |  | |  | |  | |  | |  | |
|  |  |  |  |  |  | |  | | 13/04/2015 | | 1 | |  | |  | |  | |  | |  | |
| **Healthy control (HC) group** | | |  |  |  | |  | |  | |  | |  | |  | |  | |  | |  | |
| **List** | **PPID** | **Visit Date** | **Gender** | **Age** | **Months after OIT** | | **Type** | |  | |  | |  | |  | |  | |  | |  | |
| 1 | S05 | Female | Female | 40 | 0 | | PBMC | |  | |  | |  | |  | |  | |  | |  | |
| 2 | S10 | Female | Female | 40 |  | |  | |  | |  | |  | |  | |  | |  | |  | |
| 3 | S14 | Female | Female | 28 | 0 | | PBMC | |  | |  | |  | |  | |  | |  | |  | |
| 4 | S17 | Male | Male | 32 |  | |  | |  | |  | |  | |  | |  | |  | |  | |
| 5 | S25 | Male | Male | 39 | 0 | | PBMC | |  | |  | |  | |  | |  | |  | |  | |
| 6 | S49 | Female | Female | 27 |  | |  | |  | |  | |  | |  | |  | |  | |  | |
| 7 | S51 | Male | Male | 27 | 0 | | PBMC | |  | |  | |  | |  | |  | |  | |  | |
| 8 | S52 | Female | Female | 29 |  | |  | |  | |  | |  | |  | |  | |  | |  | |
| 9 | S53 | Female | Female | 32 | 0 | | PBMC | |  | |  | |  | |  | |  | |  | |  | |
